# Supplementary material
Source: MDPI journal article supplement (https://www.mdpi.com/1999-4907/15/5/754)
Supplement: s1 [file s1]

# Supplementary Material

## Monitoring Forest Dynamics and Conducting Restoration Assessment Using Multi-Source Earth Observation Data in Northern Andes, Colombia

Carlos Pedraza <sup>1,2</sup>, Nicola Clerici <sup>2,\*</sup>, Marcelo Villa <sup>1</sup>, Milton Romero <sup>3</sup>, Adriana Sarmiento Dueñas <sup>3</sup>, Dallan Beltrán Rojas <sup>3</sup>, Paola Quintero <sup>4</sup>, Harold Mauricio Martínez <sup>4</sup> and Josef Kellndorfer <sup>5</sup>

- <sup>1</sup> DreamGIS, Bogotá 110231, Colombia; carlos@dreamgis.com (C.P.); marcelo@dreamgis.com (M.V.)  
<sup>2</sup> Department of Biology, Faculty of Natural Sciences, Universidad del Rosario, Bogotá 111221, Colombia  
<sup>3</sup> 4D Elements Consultores, Bogotá 111321, Colombia; 4delements.consultores@gmail.com (M.R.); adrianasarmi@gmail.com (A.S.D.); sdallan.db@gmail.com (D.B.R.)  
<sup>4</sup> Urrea S.A E.S.P., Environmental Unit, Montería 230002, Colombia; ambiental3@urra.com.co (P.Q.); mauriciojavier.ml@gmail.com (H.M.M.)  
<sup>5</sup> Earth Big Data LLC, Woods Hole, MA 02543, USA; josef@earthbigdata.com  
\* Correspondence: nicola.clerici@urosario.edu.co; Tel.: +57-313-348-57-26

### 1 Supplementary Figures and Tables

#### 1.1 Supplementary Figures

**Citation:** Pedraza, C.; Clerici, N.; Villa, M.; Romero, M.; Dueñas, A.S.; Rojas, D.B.; Quintero, P.; Martínez, H.M.; Kellndorfer, J. Monitoring Forest Dynamics and Conducting Restoration Assessment Using Multi-Source Earth Observation Data in Northern Andes, Colombia. *Forests* **2024**, *15*, x. <https://doi.org/10.3390/xxxxx>

Academic Editor: Qingsheng Liu

Received: 7 February 2024

Revised: 12 March 2024

Accepted: 13 March 2024

Published: date

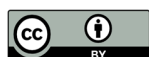

**Copyright:** © 2024 by the authors. Submitted for possible open access publication under the terms and conditions of the Creative Commons Attribution (CC BY) license (<https://creativecommons.org/licenses/by/4.0/>).

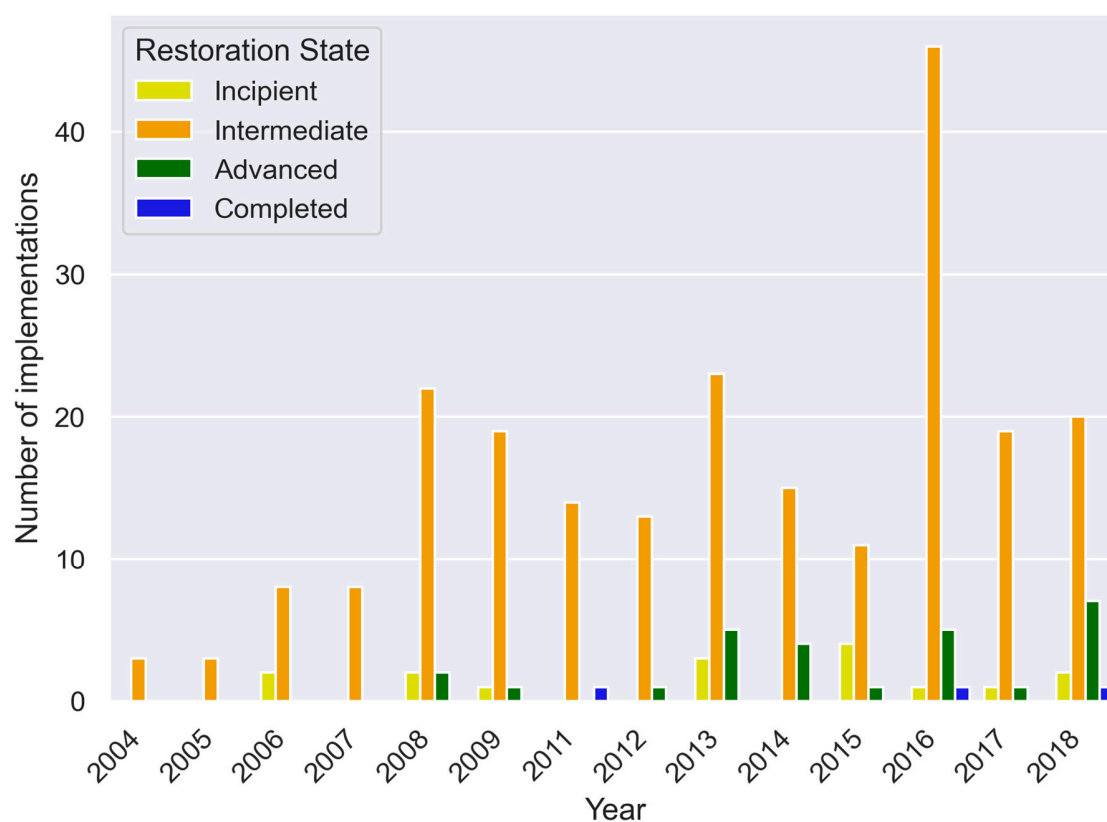

**Supplementary Figure S1.** Number of restoration plots assessed grouped by implementation state and year of implementation.

**Supplementary Table S1.** Number of restoration plots assessed, grouped by implementation state and year if implementation.

| Restoration state / Year | 2004 | 2005 | 2006 | 2007 | 2008 | 2009 | 2010 | 2012 | 2013 | 2014 | 2015 | 2016 | 2017 | 2018 |
|--------------------------|------|------|------|------|------|------|------|------|------|------|------|------|------|------|
| Advanced                 | 0    | 0    | 0    | 0    | 2    | 1    | 0    | 1    | 5    | 4    | 1    | 5    | 1    | 7    |
| Completed                | 0    | 0    | 0    | 0    | 0    | 0    | 1    | 0    | 0    | 0    | 0    | 1    | 0    | 1    |
| Incipient                | 0    | 0    | 2    | 0    | 2    | 1    | 0    | 0    | 3    | 0    | 4    | 1    | 1    | 2    |
| Intermediate             | 3    | 3    | 8    | 8    | 22   | 19   | 14   | 13   | 23   | 15   | 11   | 46   | 19   | 20   |
